# Supplementary material for: Genome-Wide Identification of the NF-Y Gene Family and Their Involvement in Bolting and Flowering in Flowering Chinese Cabbage
Source: Int J Mol Sci. 2023 Jul 25;24(15):11898. doi: 10.3390/ijms241511898 (PMC10418651; doi:10.3390/ijms241511898)
Supplement: Supplementary file 1 [file ijms-24-11898-s001.zip › Table S1.xlsx]

## Sheet: Sheet1
Gene name	Number of introns		Gene name	Number of introns		Gene name	Number of introns		Gene name	Number of introns		Gene name	Number of introns
PpNF-YA1	4		MsNF-YA1	4		RcNF-YA1	3		AtNF-YA1	4		BcNF-YA1	19
PpNF-YA2	6		MsNF-YA2	4		RcNF-YA2	4		AtNF-YA2	3		BcNF-YA2	5
PpNF-YA3	4		MsNF-YA3	4		RcNF-YA3	4		AtNF-YA3	4		BcNF-YA3	4
PpNF-YA4	4		MsNF-YA4	4		RcNF-YA4	4		AtNF-YA4	4		BcNF-YA4	3
PpNF-YA5	4		MsNF-YA5	4		RcNF-YA5	4		AtNF-YA5	2		BcNF-YA5	7
PpNF-YA6	6		MsNF-YA6	4		RcNF-YA6	4		AtNF-YA6	4		BcNF-YA6	4
PpNF-YB1	0		MsNF-YA7	4		RcNF-YB1	0		AtNF-YA7	4		BcNF-YA7	3
PpNF-YB2	4		MsNF-YA8	4		RcNF-YB2	1		AtNF-YA8	4		BcNF-YA8	2
PpNF-YB3	1		MsNF-YA9	4		RcNF-YB3	0		AtNF-YA9	4		BcNF-YA9	3
PpNF-YB4	0		MsNF-YB1	2		RcNF-YB4	0		AtNF-YA10	3		BcNF-YA10	1
PpNF-YB5	3		MsNF-YB2	2		RcNF-YB5	0		AtNF-YB1	3		BcNF-YA11	4
PpNF-YB6	0		MsNF-YB3	4		RcNF-YB6	4		AtNF-YB2	0		BcNF-YA12	9
PpNF-YB7	1		MsNF-YB4	2		RcNF-YB7	4		AtNF-YB3	0		BcNF-YA13	1
PpNF-YB8	0		MsNF-YB5	3		RcNF-YB8	0		AtNF-YB4	0		BcNF-YA14	4
PpNF-YB9	2		MsNF-YB6	1		RcNF-YB9	0		AtNF-YB5	0		BcNF-YA15	5
PpNF-YB10	4		MsNF-YB7	4		RcNF-YB10	0		AtNF-YB6	1		BcNF-YA16	5
PpNF-YB11	0		MsNF-YB8	0		RcNF-YB11	1		AtNF-YB7	0		BcNF-YA17	4
PpNF-YB12	0		MsNF-YB9	0		RcNF-YB12	0		AtNF-YB8	4		BcNF-YB1	1
PpNF-YC1	0		MsNF-YB10	0		RcNF-YC1	5		AtNF-YB9	1		BcNF-YB2	3
PpNF-YC2	5		MsNF-YB11	0		RcNF-YC2	15		AtNF-YB10	4		BcNF-YB3	2
PpNF-YC3	0		MsNF-YB12	0		RcNF-YC3	0		AtNF-YB11	2		BcNF-YB4	7
PpNF-YC4	0		MsNF-YB13	0		RcNF-YC4	1		AtNF-YB12	5		BcNF-YB5	2
PpNF-YC5	1		MsNF-YB14	0		RcNF-YC5	3		AtNF-YB13	4		BcNF-YB6	4
PpNF-YC6	0		MsNF-YB15	0		RcNF-YC6	0		AtNF-YC1	0		BcNF-YB7	5
			MsNF-YB16	3		RcNF-YC7	0		AtNF-YC2	0		BcNF-YB8	1
			MsNF-YB17	3					AtNF-YC3	0		BcNF-YB9	3
			MsNF-YB18	3					AtNF-YC4	0		BcNF-YB10	2
			MsNF-YB19	3					AtNF-YC5	0		BcNF-YB11	1
			MsNF-YB20	1					AtNF-YC6	0		BcNF-YB12	2
			MsNF-YB21	4					AtNF-YC7	0		BcNF-YB13	1
			MsNF-YB22	1					AtNF-YC8	0		BcNF-YB14	2
			MsNF-YB23	1					AtNF-YC9	0		BcNF-YB15	4
			MsNF-YB24	4					AtNF-YC10	2		BcNF-YB16	1
			MsNF-YB25	1					AtNF-YC11	5		BcNF-YB17	1
			MsNF-YB26	4					AtNF-YC12	5		BcNF-YB18	1
			MsNF-YC1	0								BcNF-YB19	1
			MsNF-YC2	0								BcNF-YB20	5
			MsNF-YC3	0								BcNF-YC1	6
			MsNF-YC4	0								BcNF-YC2	17
			MsNF-YC5	0								BcNF-YC3	3
			MsNF-YC6	0								BcNF-YC4	1
			MsNF-YC7	0								BcNF-YC5	1
			MsNF-YC8	0								BcNF-YC6	2
			MsNF-YC9	3								BcNF-YC7	0
			MsNF-YC10	6								BcNF-YC8	0
			MsNF-YC11	0								BcNF-YC9	17
			MsNF-YC12	6								BcNF-YC10	0
			MsNF-YC13	0								BcNF-YC11	3
			MsNF-YC14	7								BcNF-YC12	5
			MsNF-YC15	0
			MsNF-YC16	6
			MsNF-YC17	0
			MsNF-YC18	0
			MsNF-YC19	0
			MsNF-YC20	0
			MsNF-YC21	0
			MsNF-YC22	0
			MsNF-YC23	5
			MsNF-YC24	5
			MsNF-YC25	5
