# Supplementary material for: Genome-Wide Identification of the NF-Y Gene Family and Their Involvement in Bolting and Flowering in Flowering Chinese Cabbage
Source: Int J Mol Sci. 2023 Jul 25;24(15):11898. doi: 10.3390/ijms241511898 (PMC10418651; doi:10.3390/ijms241511898)
Supplement: Supplementary file 1 [file ijms-24-11898-s001.zip › Table S3.xlsx]

## Sheet: Sheet1
	Forward primer	Reverse primer
BcNF-YA3	GAAGGAAAGCACGTGCCAAG	CATCGCATGCTTGTGTCTCG
BcNF-YA4	GACCGTAGCTCAACCACCTC	GGAAACCTGAAAACTGGAATCCG
BcNF-YA5	AGTGGGCAAGGATGTTGGAG	TTGATCCAACGAAGACGGCA
BcNF-YA6	GTCAGATCTGCTGGAGGGAT	CAAGTAAGGTGGTTGCACTGAG
BcNF-YA7	GCTGCTGCCTGTAATGCAAA	AAGCACCGAGGGAAGACAAG
BcNF-YA8	AGGCAATCCAGGGCAAAACT	CACATCCCCTTGGACGGTTT
BcNF-YA10	TACTCAGTCCCCGACGTCAT	GCCCTGAACAGTCTTCTGCT
BcNF-YA12	TAATTAAAGCCCGGAGGCCG	GCTGCTGCATATGATGAGCTT
BcNF-YA13	AGAACGTGACAAGTCGGTCC	CCACGGTCTTTGTTGTGCTG
BcNF-YA15	AGTCGCGTAAGCCGTATCTG	GTACCACCAGAAGCAGCCAT
BcNF-YB1	GAAGGCGAGAGGATGACTCC	ATGCCCCATCGTAACAACCC
BcNF-YB4	GCTGCCTGCTAATGGGAAGA	GTGAAATCCAAAGACCCTCTCTCT
BcNF-YB5	TCGCGTGAGCAGGATAGGT	TCCTCTTCTCTCTCGTCTCCTTCG
BcNF-YB8	ACATTCTCCCACCAAACGCA	ATCGGAGGCTTCTCCAGTGA
BcNF-YB9	AATGGCAACGTTGGGGTTTG	AGGTCAAAATGTAACTTACCTCCCT
BcNF-YB10	GGATCATGAAGAAAGCATTGCCTG	CTCTTCTCTCTGGTCTCCTTCG
BcNF-YB14	TGCGAACGGGAATGAGGAAA	ACTCCCAGCTTCTTCCATGC
BcNF-YB15	TGAGCATGTTCTCAAGGCGT	CTCTGTGTGTCCTGCATGGT
BcNF-YB17	GAGAGCATCAGAGAGACGGC	CTTCCTCCACTATGGCCGC
BcNF-YB20	ACGAGATACAGAGAGGGTGACA	TACTTGGCCTGGTTGACCATC
BcNF-YC3	AAGACGGCGAATAAGGCGAA	CGACGCCATTGCTTTCCTTC
BcNF-YC5	CCTTGTCGACATCGTTCCGC	GCTGGACATAGACGCCACTC
BcNF-YC7	AATCTTCCCTAGTTGCGGCG	GGAGCGAGTCGAGGAGAAAA
BcNF-YC8	TGGATCCACACGGAGGAGAA	CTGTGCCCAGACCCCTTG
BcNF-YC10	TTCCCAGGGAGGATCTGAGG	TGTTGCTGCCACATTGGTTG
BcNF-YC11	ATCATGCAGGACGCCGTGT	ATCCGCAAGGAACTCGTATCTC
BcNF-YC12	CATGGACATGGTCACGGTCA	AGAATGCCTCACCACTTTGG
