# Supplementary material for: Genome-Wide Identification of the NF-Y Gene Family and Their Involvement in Bolting and Flowering in Flowering Chinese Cabbage
Source: Int J Mol Sci. 2023 Jul 25;24(15):11898. doi: 10.3390/ijms241511898 (PMC10418651; doi:10.3390/ijms241511898)
Supplement: Supplementary file 1 [file ijms-24-11898-s001.zip › Table S4.xlsx]

## Sheet: Sheet1
AD-NF-YA8-F	gccatggaggccagtgaattcATGCAGTTAATGGGAATGCATCA
AD-NF-YA8-R	cagctcgagctcgatggatccTCAAGATCTACTGACATTAGGACCCA
AD-NF-YA12-F	gccatggaggccagtgaattcATGGTGGGTATGGTTCCTGGT
AD-NF-YA12-R	cagctcgagctcgatggatccTCAGATATGGACAGTGAAATGGTGC
AD-NF-YB14-F	gccatggaggccagtgaattcATGGATTCGGAGAAGGCGG
AD-NF-YB14-R	cagctcgagctcgatggatccTCACTCATCTTCATCATCACCCTC
AD-NF-YB15-F	gccatggaggccagtgaattcATGGATCCGATGGATATAGTCGG
AD-NF-YB15-R	cagctcgagctcgatggatccTTAGCTTTGCAGACTTCTCTGGTC
AD-NF-YB20-F	gccatggaggccagtgaattcATGGCGGACTCGCAGGCT
AD-NF-YB20-R	cagctcgagctcgatggatccCTACTCTGCGTTCGGCATCTG
AD-NF-YC5-F	gccatggaggccagtgaattcATGGACAACAGCAACCAGCAA
AD-NF-YC5-R	cagctcgagctcgatggatccTTACACTTGCCCGTCAAGATTCC
BD-NF-YA8-F	atggccatggaggccgaattcATGCAGTTAATGGGAATGCATCA
BD-NF-YA8-R	ccgctgcaggtcgacggatccTCAAGATCTACTGACATTAGGACCCA
BD-NF-YA12-F	atggccatggaggccgaattcATGGTGGGTATGGTTCCTGGT
BD-NF-YA12-R	ccgctgcaggtcgacggatccTCAGATATGGACAGTGAAATGGTGC
BD-NF-YC5-F	atggccatggaggccgaattcATGGACAACAGCAACCAGCAA
BD-NF-YC5-R	ccgctgcaggtcgacggatccTTACACTTGCCCGTCAAGATTCC
BD-RGA1-F	atggccatggaggccgaattcATGAAGAGGGATCTTCATCAGTTCC
BD-RGA1-R	ccgctgcaggtcgacggatccTCAGTGCACAGCCGAGAGC
