# Supplementary material for: Genome-Wide Identification of the NF-Y Gene Family and Their Involvement in Bolting and Flowering in Flowering Chinese Cabbage
Source: Int J Mol Sci. 2023 Jul 25;24(15):11898. doi: 10.3390/ijms241511898 (PMC10418651; doi:10.3390/ijms241511898)
Supplement: Supplementary file 1 [file ijms-24-11898-s001.zip › Table S5.xlsx]

## Sheet: Sheet1
GAL4DB-NF-YB14-F	gtatcgccgaccggtaggcctATTTGAACGGCTGGGTTATGCA
GAL4DB-NF-YB14-R	tgaaaccagagttaaaggcctTCACTCATCTTCATCATCACCCT
GAL4DB-NF-YA8-F	gtatcgccgaccggtaggcctATGCAGTTAATGGGAATGCATCA
GAL4DB-NF-YA8-R	tgaaaccagagttaaaggcctTCAAGATCTACTGACATTAGGACCCA
GAL4DB-NF-YC5-F	gtatcgccgaccggtaggcctATGGACAACAGCAACCAGCAA
GAL4DB-NF-YC5-R	tgaaaccagagttaaaggcctTTACACTTGCCCGTCAAGATTCC
GAL4DB-NF-YB15-F	gtatcgccgaccggtaggcctATGGATCCGATGGATATAGTCGG
GAL4DB-NF-YB15-R	tgaaaccagagttaaaggcctTTAGCTTTGCAGACTTCTCTGGTC
GAL4DB-NF-YA12-F	gtatcgccgaccggtaggcctATGGTGGGTATGGTTCCTGGT
GAL4DB-NF-YA12-R	tgaaaccagagttaaaggcctTCAGATATGGACAGTGAAATGGTGC
GAL4DB-NF-YB20-F	gtatcgccgaccggtaggcctATGGCGGACTCGCAGGCT
GAL4DB-NF-YB20-R	tgaaaccagagttaaaggcctCTACTCTGCGTTCGGCATCTG
