# Supplementary material for: Genome-Wide Identification of the NF-Y Gene Family and Their Involvement in Bolting and Flowering in Flowering Chinese Cabbage
Source: Int J Mol Sci. 2023 Jul 25;24(15):11898. doi: 10.3390/ijms241511898 (PMC10418651; doi:10.3390/ijms241511898)
Supplement: Supplementary file 1 [file ijms-24-11898-s001.zip › Table S6.xlsx]

## Sheet: Sheet1
pSUPER1300-NF-YA8-F	gtcgacggtatcgataagcttATGCAGTTAATGGGAATGCATCA
pSUPER1300-NF-YA8-R	tttactcatactagtggatccAGATCTACTGACATTAGGACCCA
pSUPER1300-NF-YC5-F	gtcgacggtatcgataagcttATGGACAACAGCAACCAGCAA
pSUPER1300-NF-YC5-R	tttactcatactagtggatccCACTTGCCCGTCAAGATTCC
pSUPER1300-NF-YB15-F	gtcgacggtatcgataagcttATGGATCCGATGGATATAGTCGG
pSUPER1300-NF-YB15-R	tttactcatactagtggatccGCTTTGCAGACTTCTCTGGTC
pSUPER1300-NF-YA12-F	gtcgacggtatcgataagcttATGGTGGGTATGGTTCCTGGT
pSUPER1300-NF-YA12-R	tttactcatactagtggatccGATATGGACAGTGAAATGGTGC
pSUPER1300-NF-YB20-F	gtcgacggtatcgataagcttATGGCGGACTCGCAGGCT
pSUPER1300-NF-YB20-R	tttactcatactagtggatccCTCTGCGTTCGGCATCTG
pSUPER1300-NF-YB14-F	gtcgacggtatcgataagcttATGGATTCGGAGAAGGCGG
pSUPER1300-NF-YB14-R	tttactcatactagtggatccCTCATCTTCATCATCACCCTCTTCC
