# Supplementary figures and images for: Genome-Wide Identification of the NF-Y Gene Family and Their Involvement in Bolting and Flowering in Flowering Chinese Cabbage
Source: MDPI journal article supplement (doi:10.3390/ijms241511898), 2023-07-25

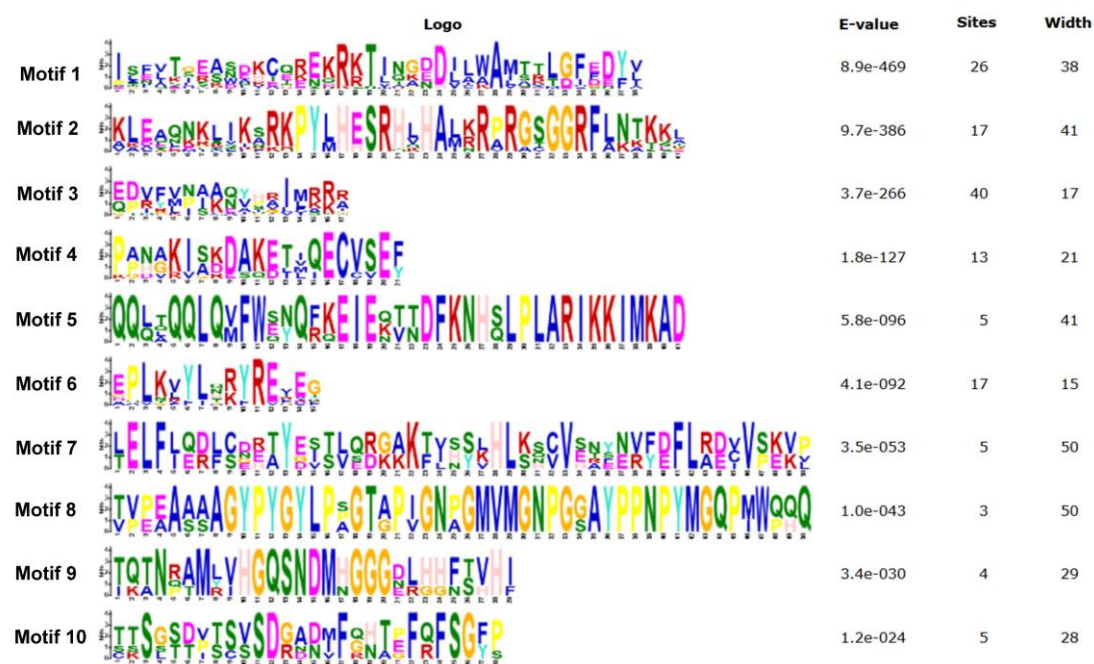

Figure S1. Sequence composition of motif.

Supplement: s1 [file s1]
